# Supplementary material
Source: PubMed Central journal article supplement (PMC6158680)
Supplement: mmc6.pdf [file mmc6.pdf]

**SupTable 1: Differentially expressed miRNAs between NE and BNE from Selection sample set A and B**

**SupTable 2: Differentially expressed miRNAs from microarray profiling of Selection sample set A**

**SupTable 3: Differentially expressed miRNAs from Nanostring nCounter profiling of Selection sample set B**

**SupTable 4: Putative miRNA targets of MIR192 and MIR194 identified by cross-referencing predicted targets with miRNAs known to be downregulated in BE.**

**SupTable 5: Primer sequences used for qRT-PCR and PCR**
